# 1 **Neural measures of subsequent memory reflect endoge-** 2 **nous variability in cognitive function**

3 Christoph T. Weidemann<sup>1</sup> & Michael J. Kahana<sup>2</sup>

4 <sup>1</sup>*Swansea University*

5 <sup>2</sup>*University of Pennsylvania*

6 **Human cognition exhibits a striking degree of variability: Sometimes we rapidly forge new**  
7 **associations whereas at other times new information simply does not stick. Correlations be-**  
8 **tween neural activity during encoding and subsequent retrieval performance have implicated**  
9 **such “subsequent memory effects” (SMEs) as important for understanding the neural basis**  
10 **of memory formation. Uncontrolled variability in external factors that also predict mem-**  
11 **ory performance, however, confounds the interpretation of these effects. By controlling for a**  
12 **comprehensive set of external variables, we investigated the extent to which neural correlates**  
13 **of successful memory encoding reflect variability in endogenous brain states. We show that**  
14 **external variables that reliably predict memory performance have relatively small effects on**  
15 **electroencephalographic (EEG) correlates of successful memory encoding. Instead, the brain**  
16 **activity that is diagnostic of successful encoding primarily reflects fluctuations in endogenous**  
17 **neural activity. These findings link neural activity during learning to endogenous states that**  
18 **drive variability in human cognition.**

19       The capacity to learn new information can vary considerably from moment to moment. We  
20 all recognize this variability in the frustration and embarrassment that accompanies associated

21 memory lapses. Researchers investigate the neural basis of this variability by analyzing brain  
22 activity during the encoding phase of a memory experiment as a function of each item's subsequent  
23 retrieval success. Across hundreds of such studies, the resulting contrasts, termed subsequent  
24 memory effects (SMEs), have revealed reliable biomarkers of successful memory encoding.<sup>1-3</sup>

25 A key question, however, is whether the observed SMEs indicate endogenously varying brain  
26 states, or whether they instead reflect variation in external stimulus- and task-related variables,  
27 such as item difficulty or proactive interference, known to strongly predict subsequent memory.<sup>4</sup>  
28 Studies characterizing SMEs generally attribute them to endogenous factors affecting encoding  
29 processes and/or to specific experimental manipulations (such as encoding instructions) aimed at  
30 directly affecting these processes.<sup>3,5,6</sup> At the same time, some of the strongest predictors of recall  
31 performance are characteristics of individual items (e.g., pre-experimental familiarity or position in  
32 the study list)<sup>7-9</sup> which are difficult to investigate, given that the successful retrieval of individual  
33 items is not under direct experimental control. Such idiosyncratic effects are therefore serious  
34 confounds in SME analyses. In cases where encoding conditions are explicitly manipulated, it is  
35 difficult to disentangle these and other external effects from ongoing endogenous fluctuations that  
36 also affect encoding success. The relative contributions of endogenous and external factors to the  
37 SME have thus yet to be established.

38 Here we approach these challenges in two ways using a large free-recall data set comprising  
39 97 individuals who each had their EEG recorded while they studied and recalled 24 word lists in  
40 each of at least 20 experimental sessions that took place over the course of several weeks. As

41 shown in Figure 1a, the presentation of each list was followed by a distractor task and a free recall  
42 test. Each list contained 24 words and the same 576 words (24 words in 24 lists) were presented  
43 in each session, but their assignment to lists, and serial positions within lists, varied (we also refer  
44 to individual word presentations as “items” irrespective of the word identities). Our first approach  
45 closely builds on standard SME analyses that compute a contrast for neural activity during each  
46 item’s presentation in the study list. Rather than only predicting subsequent memory as a binary  
47 variable, however, we also statistically accounted for a comprehensive list of external factors that  
48 correlate with recall performance and computed SMEs for the corresponding residuals. Comparing  
49 SMEs for these residuals with the standard item-level SME predicting binary retrieval success thus  
50 allowed us to estimate the relative contributions of endogenous neural variability and external  
51 factors to the SME (to the extent that SMEs are driven by external factors, SMEs should be absent  
52 when the effects of these external factors are statistically removed from recall performance).

53 For our second approach we calculated list-level SMEs (rather than the standard item-level  
54 SMEs), leveraging evidence that endogenous factors associated with cognitive function vary slowly.  
55 Specifically, sequential dependencies in human performance<sup>4, 10–12</sup> as well as investigations of en-  
56 dogenous neural fluctuations that drive variability in evoked brain activity and overt behavior<sup>13–19</sup>  
57 suggest that endogenous factors operate at time scales that are slower than the time allocated to  
58 the study of individual items in standard memory tasks (many seconds or minutes rather than a  
59 few seconds or less). To calculate list-level SMEs, we averaged epochs of EEG activity following  
60 the presentation of individual study items within each list and used these list-averaged epochs to  
61 predict the proportion of recalled words in each list. This approach eliminates or severely reduces

62 the effects of item-specific external factors (because we are averaging neural activity across all  
63 study periods in a list), but the list-level SME could still reflect other external factors that also  
64 affect recall performance (such as session-level time-of-day effects or list-level proactive interfer-  
65 ence effects).<sup>4</sup> We therefore also statistically removed effects of list and session number (as well  
66 as effects of the average “recallability” of the words comprising each list; see methods for details)  
67 and computed SMEs for the corresponding residuals. As with the item-level SMEs, comparing  
68 the SMEs predicting list-level recall to the SMEs predicting residuals of list-level recall after ac-  
69 counting for external factors associated with each list and experimental session thus allowed us  
70 to estimate the extent to which list-level SMEs are driven by endogenous factors associated with  
71 encoding success.

## 72 **Results**

73 The standard item-level subsequent memory analysis contrasts neural activity during the encoding  
74 of subsequently recalled and non-recalled items. The present experiment sequentially displayed  
75 lists of items (words) for study and tested memory in a delayed free recall task (Figure 1a). During  
76 the encoding period of each studied item, we calculated the spectral power of the EEG signal at  
77 frequencies between 2 and 200 Hz. Figure 1b shows an excerpt of an actual study list with asso-  
78 ciated  $z$ -transformed spectral power, shown as a joint function of encoding time and frequency for  
79 each excerpted item. The average time-frequency spectrogram for recalled and non-recalled items,  
80 shown in Figure 1c, illustrates the spectral subsequent memory effect reported in prior studies.<sup>1,3</sup>  
81 Specifically, subsequently recalled items exhibit greater high frequency ( $> 30$  Hz) activity and

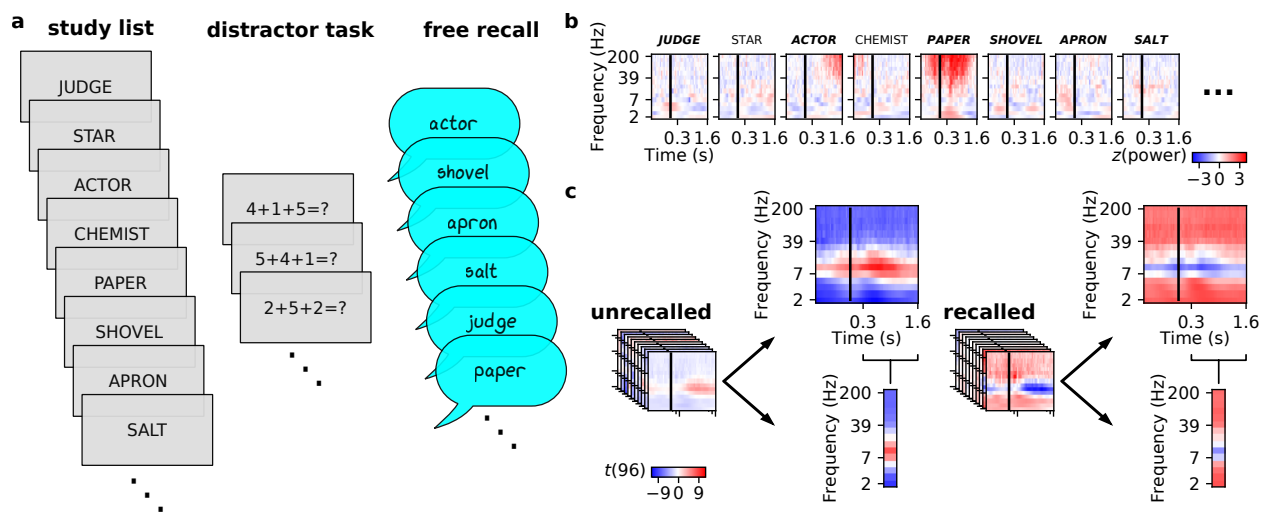

Figure 1: **(a)** Illustration of an individual trial in our experiment consisting of a study list followed by a distractor task, and a free recall test. There were 24 of these trials in each experimental session and each study list consisted of 24 items. See methods for details. **(b)**  $z$ -transformed power around the presentation of study words during the beginning and end of one participant's (ID: 374) 4th study list in the 16th experimental session. The study words are indicated at the top of each sub-panel with bold italic font indicating subsequent recall. **(c)** Average power for subsequently unrecalled (left) and subsequently recalled (right) words during study across all lists from all participants (we averaged all data within participants and calculated the shown  $t$ -values across participants). All of our analyses were based on neural activity between 0.3 and 1.6 s following study word onset (indicated with vertical black lines) and the average power across this time interval is also illustrated. For this visualization, we aggregated EEG activity across 28 superior electrodes (see methods for details).

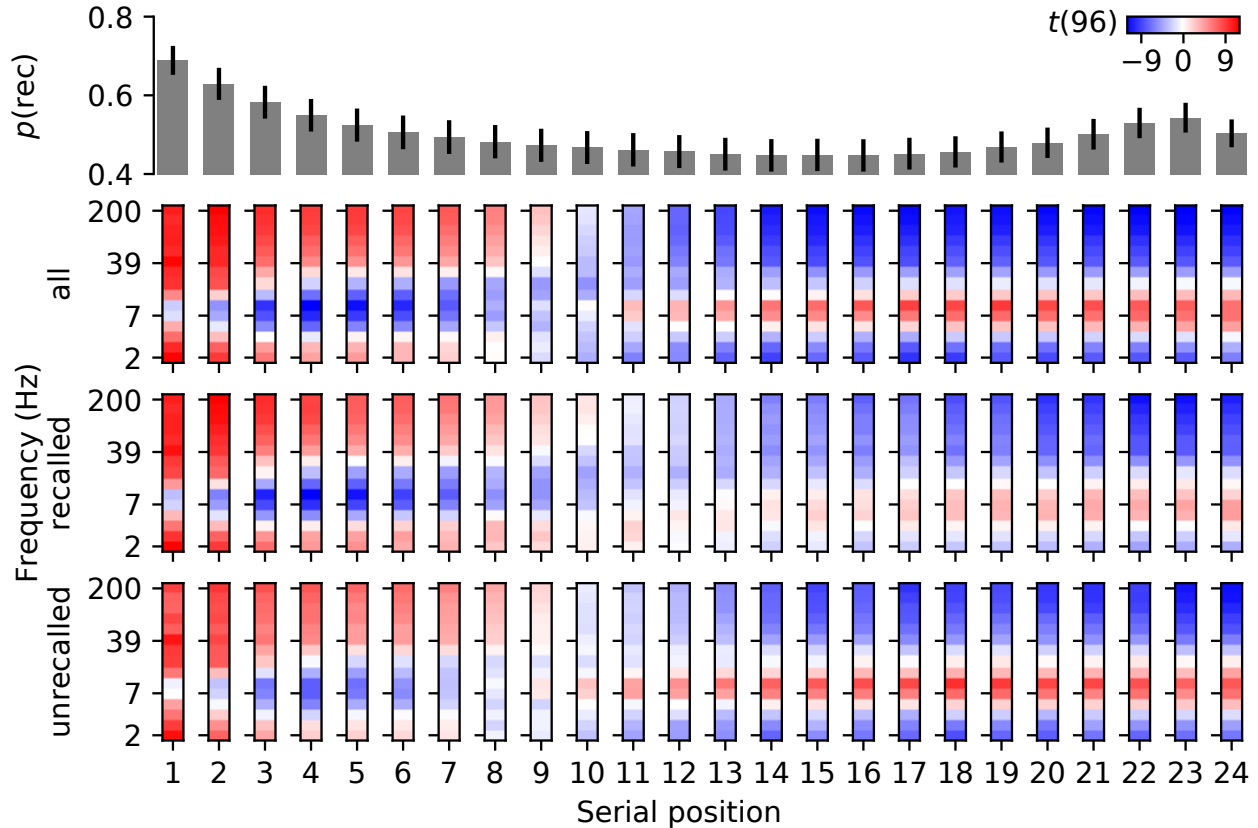

Figure 2: Mean probability of recall as a function of serial position across all participants (top row) and associated neural activity (averaged between 0.3 and 1.6 s after the onset of study items) for all, subsequently recalled, and subsequently not-recalled trials respectively (we averaged all data within participants and calculated the shown  $t$ -values across participants). Error bars indicate 95% confidence intervals. For this visualization, we aggregated EEG activity across 28 superior electrodes (see methods for details).

82 reduced alpha power (8–12 Hz) as compared with not-recalled items. Before commencing our  
83 analyses we had decided to focus on a time window between 0.3 and 1.6 s following the onset  
84 of each study item to maximize our chance of capturing item-specific effects in our SME con-  
85 trasts. However, as is evident in Figure 1c, the SME was sustained throughout the entire 1.6 s  
86 during which the item appeared on the screen and also in the pre-stimulus interval (consistent with  
87 previous reports of pre-stimulus SMEs<sup>5,20–23</sup>).

88       The power of the SME analysis lies in its ability to reveal encoding processes that lead  
89 to successful recall. However, the standard item-level SME conflates a multitude of factors that  
90 determine the recallability of any given item. The position of an item in the study list constitutes  
91 one such factor. The top of Figure 2 illustrates the serial position effect in our delayed free-recall  
92 experiment. As expected based on prior work, we observed superior recall for early list items  
93 (the so-called primacy effect). The mental arithmetic task between study and test attenuates the  
94 recency effect that is typical of immediate recall.<sup>9</sup> Given the strong effect of serial position on  
95 recall performance, we can expect any SME to also reflect a contrast of neural activity associated  
96 with different serial positions. The second row of Figure 2 shows the neural activity associated  
97 with the encoding interval at each serial position irrespective of recall status. Here one sees a  
98 marked shift in neural activity across serial positions: Neural activity at early serial positions  
99 resembles that associated with recalled items and that at later serial positions is similar to that  
100 associated with not-recalled items (cf. Figure 1c). The last two rows of Figure 2 illustrate that this  
101 pattern is not simply due to the confound between recalled status and serial position: Even when  
102 we plot the pattern of spectral activity as a function of serial position separately for recalled and  
103 not-recalled items, neural activity at early serial positions resembles that associated with recalled  
104 items and that at later serial positions is more similar to that associated with not-recalled items  
105 in the standard SME (cf. Figure 1c). This illustrates how the subsequent memory analysis can  
106 be misleading: differences between recalled and non-recalled items may be indexing differences  
107 between primacy and non-primacy items. Controlling for the effect of serial position represents a  
108 logical solution to this problem. However, serial position is but one of many variables known to

109 influence recall performance. We thus introduce a statistical framework to separate the effects of  
110 known external factors from the hypothesized endogenous variability driving encoding success, as  
111 described below.

112 Our analytic approach combines multivariate classification of neural data<sup>24,25</sup> with a multi-  
113 factor model of external variables shown to influence item-level recall performance.<sup>4</sup> To implement  
114 a multivariate analogue to the standard SME analysis, we trained L2 regularized logistic regres-  
115 sion classifiers using brain activity to predict the recall status of individual items (the performance  
116 of these models indexes what we refer to as an “uncorrected SME”). We also trained L2 regular-  
117 ized linear regression models using brain activity to predict residuals of recall performance after  
118 statistically controlling for the effects of external factors that also predict recall performance (the  
119 performance of these models indexes what we refer to as a “corrected SME”).

120 For both uncorrected and corrected SMEs, we wish to evaluate how well each model predicts  
121 (residuals of) recall performance in held out sessions. Typical metrics of model performance differ  
122 between binary classification (as in our uncorrected SME analyses) and continuous regression  
123 models (as in our corrected SME analyses). To directly compare both types of SMEs, we computed  
124 correlations between model predictions and (residual) recall performance. For the uncorrected  
125 SME, this is a point-biserial correlation because recall performance is a binary variable (each  
126 item is either recalled or not) and the model prediction is a continuous measure corresponding to  
127 the predicted recall probability of each item. For the corrected SME, this is a standard product-  
128 moment correlation between the continuous residual recall performance and the continuous model



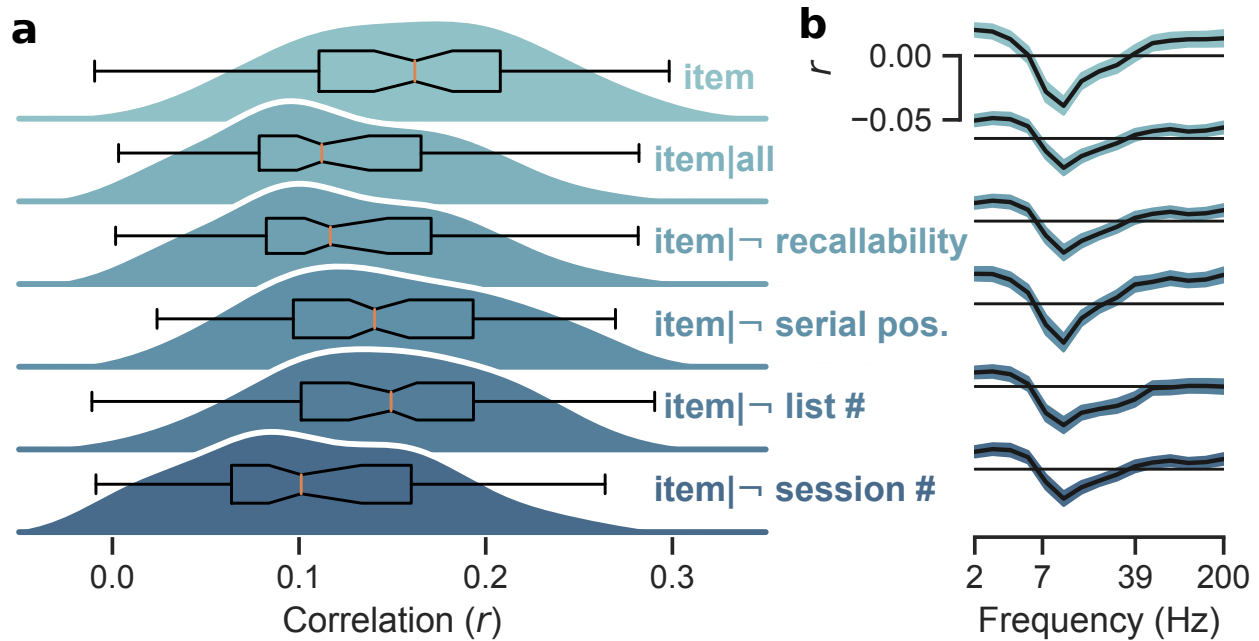

Figure 3: **(a)** Distribution of uncorrected item-level SMEs (‘‘item’’) across all participants and of corresponding corrected SMEs accounting for all factors or all but the indicated factor respectively (a ¬ prefix signifies that the indicated factor was omitted). Overlaid boxplots indicate the quartiles of the distribution with a notch showing the bootstrapped 95% CI around the median. Whiskers extend to 1.5× the inter-quartile range. **(b)** Mean correlations between power at different frequencies (aggregated across 28 superior electrodes) and the respective (residuals of) item-level recall performance across all participants (lined up with the corresponding SMEs in Panel a). The black horizontal lines indicate zero. Error regions indicate 95% CIs.

129 prediction (see *Methods* for details). Both of these models use spectral features of EEG activity  
130 during word encoding to predict that item’s (residual) recall status.

131 The correlation between model predictions and (residual) item-level recall performance quan-  
132 tifies the association between neural features during encoding and subsequent (residual) recall  
133 performance—it serves as our multivariate SME measure. The top of Figure 3a shows the distribu-  
134 tion of these correlations across participants for the uncorrected SME (distribution marked ‘‘item’’) relating neural features to the recalled status of individual items. This uncorrected SME was signif-  
135

136 icant ( $M = 0.16$ ,  $t(96) = 22.681$ ,  $SE = 0.007$ ,  $p < 0.001$ ,  $d = 2.303$ ) indicating that the different  
137 average activity patterns for recalled and not-recalled items shown in Figure 1c were indeed as-  
138 sociated with a reliable item-level SME. The next distribution (labeled “item|all”) corresponds to  
139 the corrected SME statistically controlling for all external factors. Specifically, these correlations  
140 quantify the relation between neural features and the residuals of logistic regression models pre-  
141 dicting recall status on the basis of individual item-recallability, serial position, list number within  
142 the current session, and session number within the experiment. This corrected SME, was also sta-  
143 tistically significant ( $M = 0.12$ ,  $t(96) = 19.015$ ,  $SE = 0.006$ ,  $p < 0.001$ ,  $d = 1.931$ ), indicating  
144 a substantial SME, even after controlling for external factors. The size of this SME was somewhat  
145 smaller than that for the uncorrected recall performance ( $t(96) = 9.738$ ,  $SE = 0.004$ ,  $p < 0.001$ ,  
146  $d = 0.989$ ) reflecting the fact that the uncorrected SME does include the effects of some external  
147 factors.

148 To better understand how the different factors affect the SME, we repeated this analysis, but  
149 held out each of the external factors in turn. The remaining parts of Figure 3a show the results  
150 of these analyses without controlling for the effects of recallability, serial position, list number,  
151 and session number respectively. All resulting SMEs are positive ( $M = 0.11$ – $0.15$ ,  $t(96) =$   
152  $16.341$ – $22.471$ ,  $SE = 0.006$ – $0.007$ ,  $ps < 0.001$ ,  $d = 1.659$ – $2.282$ ) and significantly different  
153 from the SME for uncorrected recall performance ( $t(96) = 4.726$ – $13.438$ ,  $SE = 0.003$ – $0.004$ ,  
154  $ps < 0.001$ ,  $d = 0.479$ – $1.364$ ) as well as from that correcting for all external factors ( $t(96) =$   
155  $5.939$ – $10.790$ ,  $SE = 0.001$ – $0.003$ ,  $ps < 0.001$ ,  $d = 0.603$ – $1.096$ ). This indicates that each of the  
156 external factors contributes to the difference between the size of the uncorrected and the corrected

157 SME and that none of these factors can account for this difference in isolation. Serial position,  
158 however, explains most of this discrepancy—when controlling for all other factors, the correspond-  
159 ing SME is almost as large as the uncorrected SME (mean correlation of 0.15 as opposed to 0.16)  
160 and additionally also controlling for serial position is responsible for reducing the SME to a mean  
161 correlation of 0.12.

162 To the extent that the uncorrected SME reflects both endogenous and external factors, we  
163 would expect that statistically removing the effects of external factors would reduce the size of  
164 the SME. Correspondingly, only partially removing effects of external factors (e.g., by holding  
165 out the removal of one of the external factors like we did in the analyses described above) should  
166 result in SMEs that fall somewhere between the uncorrected SME and the SME correcting for  
167 more external factors. This is the pattern we observed, with one notable exception: when we  
168 statistically removed the effects of all factors except for the session number, the resulting SME  
169 was slightly smaller than that for the SME also removing that effect (mean correlation of 0.11  
170 as opposed to 0.12). This indicates that recall performance varies with session number, but that  
171 this effect of session number is not effectively captured by our measures of brain activity. Hence,  
172 when we statistically controlled for the effects of session number we removed variability in recall  
173 performance that we could not account for with our measures of brain activity, leading to a slightly  
174 larger SME (and, conversely, a failure to remove the effects of session number reduced the SME).

175 As Figure 3a also shows, there was substantial overlap between the distributions for the un-  
176 corrected and corrected SMEs demonstrating that the effects of external factors were small relative

177 to the size of the SME. Specifically, the effect sizes associated with the uncorrected and corrected  
178 SMEs corresponded to Cohen's<sup>26</sup>  $d$ s of 2.303 and 1.931, respectively (with the Cohen's  $d$ s for  
179 corrected SMEs holding out one of the factors ranging between 1.659 and 2.282). The difference  
180 between the uncorrected and corrected SME was about half that size (Cohen's  $d$  of 0.989 and  
181 0.479–1.364 for the differences between the uncorrected SME and the corrected SMEs holding  
182 out one of the factors). Another way to interpret the sizes of the uncorrected and corrected SMEs  
183 relative to their difference is by directly evaluating the corresponding correlations and their differ-  
184 ence. According to Cohen's convention, the correlations for all SMEs correspond to a small effect  
185 size ( $0.1 < r < 0.3$ ). Differences in correlations can be assessed with Cohen's  $q$  (i.e., the differ-  
186 ence between the Fisher- $z$  transformed correlations) which is 0.041 for the difference between the  
187 uncorrected and corrected SME (and ranges between 0.018 and 0.054 for the differences between  
188 the uncorrected SME and the corrected SME holding out one of the factors)—all well below the  
189 threshold Cohen proposed for a small effect ( $0.1 < q < 0.3$ ).

190 Figure 3b shows correlations between power at different frequencies and (residual) recall  
191 performance to help illustrate the importance of different features for our regularized logistic and  
192 linear regression models relating brain activity to (residual) recall performance. Across all mea-  
193 sures of (residual) recall performance, correlations with spectral power were more negative in the  $\alpha$   
194 range (around 10 Hz) and less negative at higher and lower frequencies. The correlations between  
195 power and uncorrected item-level recall were positive for frequencies in the  $\gamma$  range ( $> 40$  Hz)—an  
196 effect that was substantially reduced for all item-level residuals, except for that not correcting for  
197 serial position. This suggests that positive correlations between  $\gamma$  power and recall performance

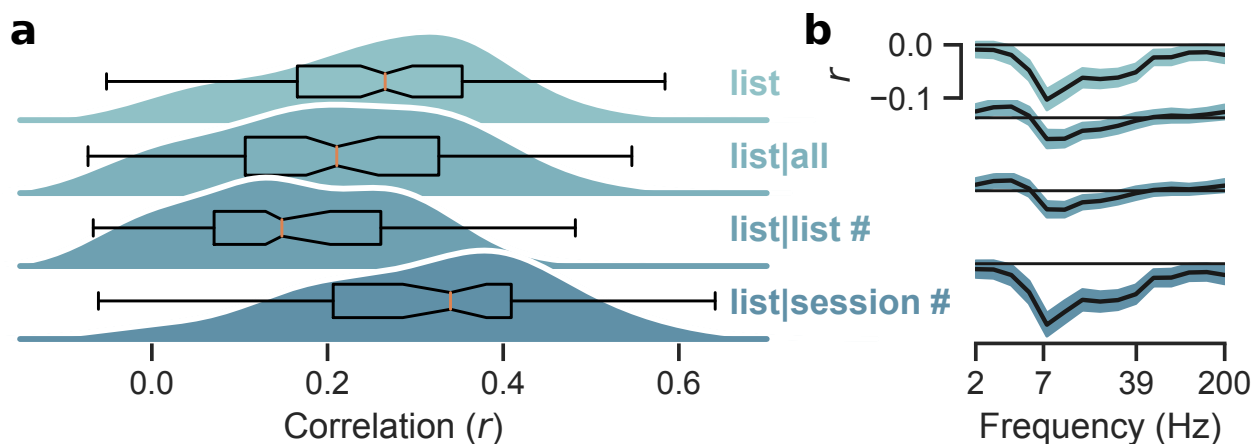

Figure 4: (a) Distribution of uncorrected list-level SMEs (“list”) across all participants and of corresponding corrected SMEs accounting for all factors or only the indicated ones (here “list #” refers to the joint effects of both list number and average recallability of words in each list). Box-plots are as in Figure 3. (b) Mean correlations between power at different frequencies (aggregated across 28 superior electrodes) and the respective (residuals of) list-level recall performance across all participants (lined up with the corresponding SMEs in Panel a). The black horizontal lines indicate zero. Error regions indicate 95% CIs.

198 largely reflect serial position effects (see also Figure 2).

199 Rather than statistically controlling for factors that were specific to individual items (i.e.,  
200 serial position and recallability), our list-level SME eliminates or severely reduces these factors by  
201 averaging brain activity over the encoding epochs to predict (residuals of) the proportion of recalled  
202 items in each list. Because each list contained the same number of items, effects of serial position  
203 averaged out, eliminating this factor from affecting list-level SMEs. Even though recallability  
204 is specific to individual items, lists could vary with respect to the average recallability of their  
205 constituent items. We therefore considered not only list number and session number, but also  
206 average recallability of items within the list as external factors to control for in our calculation of  
207 corrected list-level SMEs. As for our item-level SMEs, we quantify list-level SMEs by calculating

208 the correlations between predictions from L2 regularized linear regression models and (residual)  
209 recall performance.

210 The top of Figure 4a (labeled “list”) shows the distribution of the uncorrected list-level SME  
211 ( $M = 0.26$ ,  $t(96) = 18.213$ ,  $SE = 0.015$ ,  $p < 0.001$ ,  $d = 1.849$ ). It is tempting to compare  
212 the size of this list-level SME to the item-level SME shown at the top row of Figure 3a, but such  
213 direct comparisons are difficult to make sensibly. The EEG features driving the list-level SME  
214 were averaged across all study epochs within each list, whereas the item-level SME relied on  
215 features from individual epochs. Thus the neural features making up the item and list-level SMEs  
216 may differ substantially in their respective signal to noise ratios and the number of observations  
217 contributing to these different kinds of SMEs also differed considerably (in our case by a factor of  
218 24, because each list consisted of 24 items).

219 To calculate corrected list-level SMEs, we fit linear regression models to predict list-level  
220 recall performance on the basis of average recallability of items in that list, list number, and session  
221 number. We then used brain activity to predict residual list-level recall performance. The second  
222 row of Figure 4a (labeled “list|all”) shows this corrected list-level SMEs ( $M = 0.22$ ,  $t(96) =$   
223  $14.332$ ,  $SE = 0.015$ ,  $p < 0.001$ ,  $d = 1.455$ ). This effect was smaller than the uncorrected list-  
224 level SME ( $t(96) = 5.548$ ,  $SE = 0.008$ ,  $p < 0.001$ ,  $d = 0.563$ ), reflecting the fact that external  
225 factors do contribute to the uncorrected list-level SME. The fact that we could demonstrate a sizable  
226 corrected list-level SME, however, supports our previous result that external factors are not critical  
227 drivers of the SME.

228 To better understand the extent to which list and session-level external factors contribute to  
229 the list-level SME, we statistically controlled for average recallability of items within each list and  
230 list number (list-level effects; third row of Figure 4b labeled “list|list #”) and, separately, for session  
231 number (session-level effects; fourth row of Figure 4b labeled “list|session #”). The corresponding  
232 SMEs were significant ( $M = 0.16$  and  $0.32$ ,  $t(96) = 12.668$  and  $20.132$ ,  $SE = 0.013$  and  $0.016$ ,  
233 respectively, both  $ps < 0.001$ ,  $d = 1.286$  and  $2.044$ , respectively). Their sizes, however, fell  
234 outside the range spanned by the SME controlling for all external factors and the uncorrected SME.  
235 The SME correcting for list-level factors was smaller than that correcting for all external factors  
236 and the uncorrected SME ( $t(96) = 11.606$  and  $12.466$ ,  $SE = 0.005$  and  $0.008$ , respectively,  
237 both  $ps < 0.001$ ,  $d = 1.178$  and  $1.266$ , respectively), whereas the SME correcting for session  
238 was larger than both ( $t(96) = 13.134$  and  $13.950$ ,  $SE = 0.009$  and  $0.005$ , respectively, both  
239  $ps < 0.001$ ,  $d = 1.333$  and  $1.416$ , respectively). This pattern confirms our previous finding that  
240 our measures of brain activity did not effectively capture session-level external factors that affect  
241 recall performance. Hence, statistically controlling for their effects enhances our ability to predict  
242 residual recall performance from brain activity whereas a failure to remove that variability from  
243 recall performance reduces the SME.

244 As for the item-level SMEs, Figure 4a shows substantial overlap between the distributions  
245 for the uncorrected and corrected list-level SMEs. Analyses of corresponding effect sizes confirm  
246 that here, too, effects of external factors were small relative to the size of the SME. Specifically  
247 Cohen’s  $d$  for the uncorrected and corrected SMEs were  $1.849$  and  $1.455$ , respectively (correspond-  
248 ing  $ds$  for the corrected SME considering only list or session-related factors were  $1.286$  and  $2.044$

249 respectively). The size of the difference between the uncorrected and the corrected SME was only  
250 about a third ( $d = 0.563$ ) of the individual effects (but,  $d = 1.266$  and  $1.416$  for the corrected  
251 SMEs only accounting for list and session-related factors, respectively). As before, we can also  
252 interpret the size of these effects by considering the corresponding correlations directly. From that  
253 perspective, the uncorrected and all corrected SMEs correspond to small effects ( $0.1 < r < 0.3$ )  
254 whereas the differences between the uncorrected and the corrected SME falls short of a small ef-  
255 fect ( $q = 0.047$ ; corresponding  $qs$  for the differences with corrected SMEs considering only list or  
256 session-related factors were  $0.1$  and  $0.07$  respectively).

257 Just as in Figure 3b, Figure 4b shows the correlations between power in different frequencies  
258 and (residuals of) recall performance. The qualitative pattern of these correlations aligned with the  
259 pattern for item-level SMEs with more negative correlations in the  $\alpha$  range and less negative cor-  
260 relations at lower and higher frequencies. Positive correlations between  $\gamma$  power and (residuals of)  
261 list-level recall performance were absent, supporting our previous interpretation that these positive  
262 correlations in item-level SMEs are largely driven by serial position effects (which are averaged  
263 out in the list-level analyses).

264 The presence of a robust list-level SME is compatible with endogenous factors that vary  
265 slowly (over many seconds or minutes) rather than with the presentation of individual items during  
266 the study list. Indeed, to the extent that factors driving the SME are closely linked to the pre-  
267 sentation of individual items, characterizing these factors as “endogenous” would be problematic.  
268 To investigate the extent to which factors predicting subsequent recall are tied to individual items



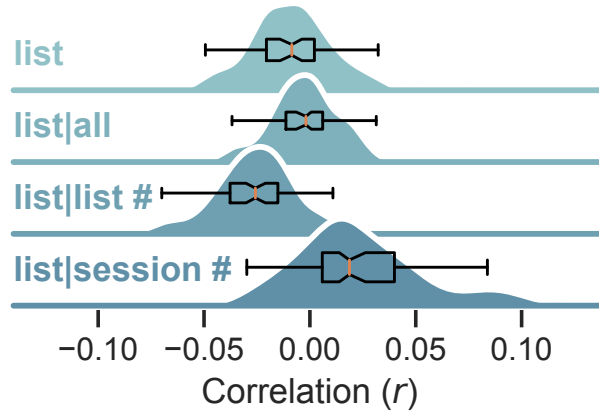

Figure 5: Distribution of uncorrected list-level SMEs (“list”) across all participants for synthesized lists made up from randomly selected items within a session (see methods for details) and of corresponding corrected SMEs accounting for all factors or only the indicated ones (here “list #” refers to the joint effects of both list number and average recallability of words in each list). Boxplots are as in Figures 3 and 4.

269 rather than varying more slowly over the study periods we constructed shuffled lists that mirrored  
270 the distribution of recall performance, but synthesized lists from randomly selected items within  
271 each session. Figure 5 shows the list-level SMEs for these shuffled lists. As is evident from the  
272 Figure, this shuffling procedure practically eliminated the SME. High statistical power resulted  
273 in statistically significant deviations from zero, but the largest shuffled SME corresponded to a  
274 mean correlation of 0.03 with the residual recall performance after accounting for session effects  
275 which was an order of magnitude smaller than the corresponding unshuffled SME. All shuffled  
276 SMEs were significantly smaller than the corresponding unshuffled ones ( $t(96) = 14.286-20.361$ ,  
277  $SE = 0.013-0.016$ ,  $ps < 0.001$ ,  $d = 1.450-2.067$ ), supporting our previous result that (slowly  
278 varying) endogenous factors (rather than item-specific, or otherwise external, factors) are the main  
279 drivers of the SME.

## 280 Discussion

281 The subsequent memory analysis of neural data has provided researchers with a powerful tool  
282 for uncovering the brain mechanisms that underlie successful memory formation. Armed with  
283 this methodology, cognitive neuroscientists have conducted hundreds of experiments, using a wide  
284 range of recording techniques, seeking to elucidate the brain signals and networks that accom-  
285 pany memory acquisition. Yet, despite an impressive body of data amassed in recent decades, key  
286 questions about the neural correlates of memory acquisition remain unanswered. Specifically, to  
287 what extent do these neural correlates reflect known external factors that determine memorability,  
288 or endogenously varying brain states that determine the efficiency of memory acquisition? Prior  
289 research suggests that both external and endogenous factors play a role: On the one hand, experi-  
290 mental manipulations of item encoding affect the SME,<sup>5,27,28</sup> suggesting a role for external factors.  
291 On the other hand, neural activity prior to item onset predicts subsequent memory, suggesting a  
292 role for endogenous factors unrelated to item processing.<sup>5,20-23</sup> We approached this question by  
293 examining how the SME changed after statistically controlling for a comprehensive set of external  
294 factors. We also sought to remove effects of item-specific external factors by aggregating brain  
295 activity over the study periods of all items within a list to predict list-level recall (i.e., a list-level  
296 SME). Both approaches for removing the effects of external factors resulted in relatively modest  
297 decreases to the SME, implicating endogenous factors as the main drivers of the SME.

298 Because it is impossible to perfectly control for effects of all possible external factors, distin-  
299 guishing between effects of external variables and endogenous processes is notoriously difficult.

300 We approached this challenge by treating serial position, list, and session number as categorical  
301 predictors, effectively modeling the joint effects of external factors associated with these predictors  
302 without having to commit to a particular functional form relating these predictors to recall perfor-  
303 mance. By fitting these models separately to the data from each individual, we were also able to  
304 accommodate individual differences. Our approach attributed any variability in recall performance  
305 that covaried with one of our external factors to that factor, even though it is likely that some of that  
306 variability could reasonably be classified as “endogenous” (e.g., sessions could be administered at  
307 different times from day to day, and corresponding effects of circadian rhythms would have been  
308 classified as an external session effect). This approach to modeling external factors should yield  
309 a conservative estimate of the contributions of endogenous factors, despite the fact that we cannot  
310 completely rule out contributions of external factors to our corrected SMEs.

311 Our findings of strong list-level SMEs, and their elimination when synthesizing lists of ran-  
312 domly selected items within a session, provide strong additional evidence against the interpretation  
313 that the SME reflects item-level factors that influence memorability. Instead these findings suggest  
314 that relevant endogenous factors vary at the time scale of entire list presentations. Averaging brain  
315 activity across encoding periods within a list thus yields a signal that is strongly predictive of list-  
316 level recall performance, because items that are studied together are studied in similar “cognitive  
317 states.” These findings raise the questions about the nature of the relevant endogenous factors pro-  
318 ducing these states. The prominent negative correlation between recall performance and  $\alpha$  power  
319 (shown in Figures 1c, 3b, and 4b) could suggest that the endogenous factors that drive the SMEs  
320 reflect attentional engagement during memory encoding.<sup>29</sup> According to this interpretation, SMEs

321 would not specifically index mnemonic encoding processes and should generalize to other tasks  
322 without memory tests. Further work is required to establish the extent to which SMEs reflect  
323 general attentional processes or specifically relate to successful memory encoding. Within the  
324 multivariate approach introduced here, this question could be addressed by contrasting decoding  
325 and cross-decoding performance of multivariate models applied to different tasks.<sup>25</sup>

326       Because SMEs have been demonstrated in tasks other than free recall, and for various mea-  
327 sures of brain activity,<sup>3,30-32</sup> future work will need to address the question of how endogenous  
328 neural variation underlies memory encoding outside of our experimental setting. The fact that sub-  
329 stantial SMEs remained after accounting for a comprehensive set of external variables may appear  
330 in conflict with findings that encoding task manipulations can affect the specific form of SMEs,  
331 at least for recognition memory.<sup>5,27,28,33,34</sup> Here we show that in the absence of direct manipula-  
332 tions of how study items are presented or processed, SMEs mainly reflect endogenous factors with  
333 relatively modest contributions from external factors, at least for EEG activity in a free recall task.

334       Our findings align with reports of sequential dependencies in human performance<sup>4,10-12</sup> as  
335 well as with those of slow endogenous neural fluctuations that drive variability in evoked brain ac-  
336 tivity and overt behavior.<sup>13-19</sup> Previous investigations of endogenous variability in neural activity  
337 and performance have relied on exact repetitions of stimuli across many experimental trials to limit  
338 variability in external factors. To study the effects of endogenous variability on recall performance,  
339 we took a complementary approach by statistically removing the effects of a comprehensive set of  
340 external factors. Despite the differences in methodologies and tasks, the conclusions are remark-

ably consistent in establishing an important role for slowly varying fluctuations in neural activity  
as drivers of variability in human cognition.

Because encoding and retrieval processes jointly determine mnemonic success, it is notoriously difficult to study either process in isolation. The assessment of encoding-related brain activity as a function of subsequent memory performance offers a powerful tool for isolating neural processes specifically underlying memory formation. As typically used, however, this method conflates external factors that predict subsequent memory (e.g., item complexity) and endogenously varying neural processes. Here we used two new methods to deconfound these factors: First, we used a statistical model to control for external factors and examined the SME on residual performance measures. Second, we introduced a new list-level SME and a session-level resampling control procedure that identifies encoding-related neural activity that varies at the time-scale of entire list presentations. Both approaches showed that endogenous neural activity dominates the subsequent memory effect, highlighting its effectiveness for the study of cognitive processes associated with memory acquisition.

## Methods

**Participants** We analyzed data from 97 young adults (18–35) who completed at least 20 sessions in Experiment 4 of the Penn Electrophysiology of Encoding and Retrieval Study (PEERS) in exchange for monetary compensation. This study was approved by the Institutional Review Board at the University of Pennsylvania and we obtained informed consent from all participants. Recall performance for a large subset of the current data set was previously reported,<sup>4</sup> but this is the first

361 report of electrophysiological data from this experiment. Data from PEERS experiments are freely  
362 available at <http://memory.psych.upenn.edu> and have been reported in several previous  
363 publications.<sup>35-42</sup> Our analyses included data from all participants with at least 20 sessions.

364 **Experimental task** Each of up to 23 experimental sessions consisted of 24 study lists that each  
365 were followed by a delayed free recall test. Specifically, each study list presented 24 session-  
366 unique English words sequentially for 1,600 ms each with a blank inter-stimulus interval that was  
367 randomly jittered (following a uniform distribution) between 800 and 1,200 ms. After the last  
368 word in each list, participants were asked to solve a series of arithmetic problems of the form  
369  $A + B + C = ?$  where,  $A$ ,  $B$ , and  $C$  were integers in  $[1, 9]$ . Participants responded to each problem  
370 by typing the result and were rewarded with a monetary bonus for each correctly solved equation.  
371 These arithmetic problems were displayed until 24 s had elapsed and were then followed by a blank  
372 screen randomly jittered (following a uniform distribution) to last between 1,200 and 1,400 ms.  
373 Following this delay, a row of asterisks and a tone signaled the beginning of a 75 s free recall  
374 period. A random half of the study lists (except for the first list in each session) were also preceded  
375 by the same arithmetic distractor task which was separated from the first study-item presentation  
376 by a random delay jittered (following a uniform distribution) to last between 800 and 1,200 ms.  
377 Each session was partitioned into 3 blocks of 8 lists each and blocks were separated by short  
378 (approximately 5 min) breaks. At each session participants were asked to rate their alertness and  
379 indicate the number of hours they had slept in the previous night.

380 **Stimuli** Across all lists in each session the same 576 common English words (24 words in each of  
381 24 lists) were presented for study, but their arrangement into lists differed from session to session

382 (subject to constraints on semantic similarity<sup>35</sup>). These 576 words were selected from a larger  
383 word pool (comprising 1,638 words) used in other PEERS experiments. The 576-word subset  
384 of this pool used in the current experiment is included as supplementary material and ranged in  
385 arousal (2.24–7.45,  $M = 4.04$ ) and valence (1.71–8.05,  $M = 5.52$ ) according to independent  
386 ratings on these dimensions on scales between 1 and 9.<sup>43</sup> Many participants also returned for a  
387 24th session that used words from the entire 1,638-word pool, but we are not reporting data from  
388 that session here. We estimated the mean recallability of items in a list from the proportion of  
389 times each word within the list was recalled by other participants in this study.

390 **EEG data collection and processing** Electroencephalogram (EEG) data were recorded with ei-  
391 ther a 129 channel Geodesic Sensor net using the Netstation acquisition environment (Electrical  
392 Geodesics, Inc.; EGI) or with a 128 channel Biosemi Active Two system. EEG recordings were  
393 re-referenced offline to the average reference. Because our regression models weighted neural fea-  
394 tures with respect to their ability to predict (residuals of) recall performance in held out sessions,  
395 we did not try to separately eliminate artifacts in our EEG data. Data from each participant were  
396 recorded with the same EEG system throughout all sessions and for those sessions recorded with  
397 the Geodesic Sensor net, we excluded 26 electrodes that were placed on the face and neck, rather  
398 than the scalp, from further analyses. For the visualization of EEG activity in the figures, we ag-  
399 gregated over electrodes 4, 5, 12, 13, 19, 20, 24, 28, 29, 37, 42, 52, 53, 54, 60, 61, 78, 79, 85,  
400 86, 87, 92, 93, 111, 112, 117, 118, and 124 for the EGI system and electrodes A5, A6, A7, A18,  
401 A31, A32, B2, B3, B4, B18, B19, B31, B32, C2, C3, C4, C11, C12, C24, C25, D2, D3, D4, D12,  
402 D13, D16, D17, and D28 for the Biosemi system. These correspond to the superior regions of

403 interest used we used previously.<sup>44</sup> All of our classification and regression models, however, used  
404 measures from all individual electrodes (with the exception of those covering the face and neck  
405 for the EGI system) as input without any averaging across electrodes. The EGI system recorded  
406 data with a 0.1 Hz high-pass filter and we applied a corresponding high-pass filter to the data  
407 collected with the Biosemi system. We used MNE,<sup>45,46</sup> the Python Time-Series Analysis (PTSA)  
408 library ([https://github.com/pennmem/ptsa\\_new](https://github.com/pennmem/ptsa_new)), Sklearn<sup>47</sup> and custom code for all  
409 analyses.

410 We first partitioned EEG data into epochs starting 800 ms before the onset of each word  
411 in the study lists and ending with its offset (i.e., 1,600 ms after word onset). We also included  
412 an additional 1,200 ms buffer on each end of each epoch to eliminate edge effects in the wavelet  
413 transform. We calculated power in 15 logarithmically spaced frequencies between 2 and 200 Hz,  
414 applied a log-transform, and down-sampled the resulting time series of log-power values to 50 Hz.  
415 We then truncated each epoch to 300–1,600 ms after word onset. For the item-based models we  
416 used each item's  $z$ -transformed mean power in each frequency across this 1,300 ms interval as  
417 features to predict (residual) subsequent recall. For the list-based regression models we averaged  
418 these values across all items in each list to predict (residuals of) list-level recall.

419 **Removing effects of external factors** For the item based analyses we fit logistic regression mod-  
420 els separately for each participant to predict each item's recall from its average recallability (i.e.,  
421 its average probability of recall calculated from all other participants' recall data), its serial posi-  
422 tion within the study list, the list number within the current session, and the session number within  
423 the experiment. We treated all of these predictors, except for recallability, as categorical to accom-



424 modate any functional relationship between them and recall performance. This allowed us to use  
425 list and session number as predictors to model the combined effects of list and session-specific ex-  
426 ternal factors rather than attempting to capture each of them separately. Furthermore, fitting these  
427 models separately to each participant's data allowed us to accommodate potentially idiosyncratic  
428 relationships between external factors and the predictors in our model as well as those between ex-  
429 ternal factors and recall performance. We then calculated residuals from the full model including  
430 all item-level predictors as well as from nested models including all but one of the predictors as de-  
431 scribed in the main text. Residuals from logistic regression models are constrained to fall between  
432  $-1$  and  $1$  (assuming the two possible outcomes are codes as  $0$  and  $1$ ). To make these residuals more  
433 similar to those from the linear regression models, we transformed the residuals to fall between  $0$   
434 and  $1$  (just like list-level recall probabilities) and then applied a logit-transform:  $\text{res}_t = \frac{(\text{res}+1)/2}{1-(\text{res}+1)/2}$ ,  
435 where  $\text{res}_t$  and  $\text{res}$  are the transformed and untransformed residuals respectively. All references to  
436 residuals from logistic regression models in other parts of this paper refer to transformed residuals.

437 For the list-based analyses we proceeded similarly, fitting linear regression models separately  
438 for each participant to predict the logit transformed probability of recall for each list (i.e., the pro-  
439 portion of words that were recalled in each list). We used the average recallability of words within  
440 each list, list number within each session, and session number within the experiment as predictors  
441 (treating list and session number as categorical predictors). We again calculated residuals for the  
442 full model and also for two nested models: one including average recallability for each list and list  
443 number (list-level predictors) and one only including session number (session-level predictor).

444 **Item-based classifier** For the item-based classifier we used a nested cross-validation procedure to  
445 simultaneously determine the regularization parameter and performance of L2-regularized logistic  
446 regression models predicting each item's subsequent recall. We applied this nested cross-validation  
447 approach separately to the data from each participant to accommodate idiosyncratic relationships  
448 between brain activity and recall performance and inter-individual differences in signal quality.  
449 At the top level of the nested cross-validation procedure we held out each session once—these  
450 held out sessions were used to assess the performance of the models. Within the remaining ses-  
451 sions, we again held out each session once—these held-out sessions from within each top-level  
452 cross-validation fold were used to determine the optimal regularization parameter,  $C$ , for Sklearn's  
453 LogisticRegression class. We fit models with 9 different  $C$  values between 0.00002 and 1 to the  
454 remaining sessions within each cross-validation fold and evaluated their performance as a function  
455 of  $C$  on the basis of the held out sessions within this fold. We then fit another logistic regression  
456 model using the best-performing  $C$  value to all sessions within each cross-validation fold and de-  
457 termined the model predictions on the sessions that were held-out at the top level. We determined  
458 the performance of our models solely on the basis of the predictions from these held-out sessions.  
459 There are many reasonable alternatives to for setting up these models. Our choice of L2 regulariza-  
460 tion was motivated by good performance of these models in similar data sets,<sup>25,42</sup> and not informed  
461 by the current results.

462 **Item and list-based regression models** For the item- and list-based regression models we fol-  
463 lowed the same procedure as for the item-based classifier to determine the optimal level of regu-  
464 larization for L2 regularized linear regression models predicting residuals of item-level recall or

465 (residuals of) list-level recall performance. Specifically, we used the same nested cross-validation  
466 procedure described above to determine optimal values for  $\alpha$  (corresponding to  $1/C$ ), the regular-  
467 ization parameter in Sklearn's Ridge class, testing 9 values between 1 and 65536. We applied these  
468 models to the (logit-transformed) proportion of items recalled for each list and to the residuals from  
469 the various item- and list-level models as described above.

470 **Shuffled control lists** For our list-level analyses we also computed SMEs for shuffled control lists  
471 to investigate the extent to which SMEs were linked to individual item properties or instead relied  
472 on slowly varying endogenous factors. For this approach, we separated all recalled and unrecalled  
473 items in each session, shuffled both sets of items separately, and then synthesized new lists with  
474 the original proportions of recalled and unrecalled items from the shuffled pools of recalled and  
475 unrecalled items. We repeated this procedure 20 times for each participant and concatenated the  
476 resulting shuffled lists. This shuffled session thus consisted of 20 copies of each item synthesized  
477 into 480 lists that matched the recall performance of the 24 original lists (the performance of each  
478 original list was represented 20 times in the shuffled session). We then applied all of our list-level  
479 SME analyses to these shuffled lists.

480 **Data availability** Data from this experiment are freely available at [http://memory.psych.](http://memory.psych.upenn.edu)  
481 [upenn.edu](http://memory.psych.upenn.edu).

482 **Code availability** Data analysis code from this manuscript is freely available at [http://memory.](http://memory.psych.upenn.edu)  
483 [psych.upenn.edu](http://memory.psych.upenn.edu).

- 485 1. Paller, K. A. & Wagner, A. D. Observing the transformation of experience into memory.  
486 *Trends in Cognitive Sciences* **6**, 93–102 (2002).
- 487 2. Kim, H. Neural activity that predicts subsequent memory and forgetting: A meta-analysis of  
488 74 fMRI studies. *NeuroImage* **54**, 2446–2461 (2011).
- 489 3. Hanslmayr, S. & Staudigl, T. How brain oscillations form memories — a processing based  
490 perspective on oscillatory subsequent memory effects. *NeuroImage* **85**, 648–655 (2014).
- 491 4. Kahana, M. J., Aggarwal, E. V. & Phan, T. D. The variability puzzle in human memory.  
492 *Journal of Experimental Psychology: Learning, Memory, and Cognition* (2018).
- 493 5. Fellner, M.-C., Bäuml, K.-H. T. & Hanslmayr, S. Brain oscillatory subsequent memory effects  
494 differ in power and long-range synchronization between semantic and survival processing.  
495 *NeuroImage* **79**, 361–370 (2013).
- 496 6. Hanslmayr, S., Spitzer, B. & Bäuml, K.-H. Brain oscillations dissociate between semantic and  
497 nonsemantic encoding of episodic memories. *Cerebral Cortex* **19**, 1631–1640 (2009).
- 498 7. DeLosh, E. L. & McDaniel, M. A. The role of order information in free recall: Application  
499 to the word-frequency effect. *Journal of Experimental Psychology: Learning, Memory, and*  
500 *Cognition* **22**, 1136–1146 (1996).
- 501 8. Merritt, P. S., DeLosh, E. L. & McDaniel, M. A. Effects of word frequency on individual-  
502 item and serial order retention: Tests of the order-encoding view. *Memory & Cognition* **34**,  
503 1615–1627 (2006).

- 504 9. Murdock, B. B., Jr. The serial position effect of free recall. *Journal of Experimental Psychol-*  
505 *ogy* **64**, 482–488 (1962).
- 506 10. Gilden, D., Thornton, T. & Mallon, M. 1/f noise in human cognition. *Science* **267**, 1837–1839  
507 (1995).
- 508 11. Mueller, S. T. & Weidemann, C. T. Decision noise: An explanation for observed violations of  
509 signal detection theory. *Psychonomic Bulletin & Review* **15**, 465–494 (2008).
- 510 12. Verplanck, W. S., Collier, G. H. & Cotton, J. W. Nonindependence of successive responses  
511 in measurements of the visual threshold. *Journal of Experimental Psychology* **44**, 273–282  
512 (1952).
- 513 13. Monto, S., Palva, S., Voipio, J. & Palva, J. M. Very slow EEG fluctuations predict the dynamics  
514 of stimulus detection and oscillation amplitudes in humans. *Journal of Neuroscience* **28**, 8268–  
515 8272 (2008).
- 516 14. Schroeder, C. E. & Lakatos, P. Low-frequency neuronal oscillations as instruments of sensory  
517 selection. *Trends in Neurosciences* **32**, 9–18 (2009).
- 518 15. Arieli, A., Sterkin, A., Grinvald, A. & Aertsen, A. Dynamics of ongoing activity: Explanation  
519 of the large variability in evoked cortical responses. *Science* **273**, 1868–1871 (1996).
- 520 16. Fox, M. D., Snyder, A. Z., Zacks, J. M. & Raichle, M. E. Coherent spontaneous activity  
521 accounts for trial-to-trial variability in human evoked brain responses. *Nature Neuroscience* **9**,  
522 23–25 (2005).

- 523 17. Fox, M. D., Snyder, A. Z., Vincent, J. L. & Raichle, M. E. Intrinsic fluctuations within cortical  
524 systems account for intertrial variability in human behavior. *Neuron* **56**, 171–184 (2007).
- 525 18. Fox, M. D. & Raichle, M. E. Spontaneous fluctuations in brain activity observed with func-  
526 tional magnetic resonance imaging. *Nature Reviews Neuroscience* **8**, 700–711 (2007).
- 527 19. Raichle, M. E. The restless brain: how intrinsic activity organizes brain function. *Philosophi-  
528 cal Transactions of the Royal Society B: Biological Sciences* **370**, 20140172 (2015).
- 529 20. Sweeney-Reed, C. M. *et al.* Pre-stimulus thalamic theta power predicts human memory for-  
530 mation. *NeuroImage* **138**, 100–108 (2016).
- 531 21. Otten, L. J., Quayle, A. H., Akram, S., Ditewig, T. A. & Rugg, M. D. Brain activity before an  
532 event predicts later recollection. *Nature Neuroscience* **9**, 489–491 (2006).
- 533 22. Guderian, S., Schott, B. H., Richardson-Klavehn, A. & Duzel, E. Medial temporal theta state  
534 before an event predicts episodic encoding success in humans. *Proceedings of the National  
535 Academy of Sciences* **106**, 5365–5370 (2009).
- 536 23. Park, H. & Rugg, M. D. Prestimulus hippocampal activity predicts later recollection. *Hip-  
537 pocampus* **20**, 24–28 (2010).
- 538 24. Ezzyat, Y. *et al.* Closed-loop stimulation of temporal cortex rescues functional networks and  
539 improves memory. *Nature Communications* **9** (2018).

- 540 25. Weidemann, C. T. *et al.* Neural activity reveals interactions between episodic and semantic  
541 memory systems during retrieval. *Journal of Experimental Psychology: General* **148**, 1–12  
542 (2019).
- 543 26. Cohen, J. *Statistical Power Analysis for the Behavioral Sciences* (Lawrence Erlbaum Asso-  
544 ciates, 1988).
- 545 27. Otten, L. J. & Rugg, M. D. Electrophysiological correlates of memory encoding are task-  
546 dependent. *Cognitive Brain Research* **12**, 11–18 (2001).
- 547 28. Staudigl, T. & Hanslmayr, S. Theta oscillations at encoding mediate the context-dependent  
548 nature of human episodic memory. *Current Biology* **23**, 1101–1106 (2013).
- 549 29. Sadaghiani, S. & Kleinschmidt, A. Brain networks and  $\alpha$ -oscillations: Structural and func-  
550 tional foundations of cognitive control. *Trends in Cognitive Sciences* **20**, 805–817 (2016).
- 551 30. Fernandez, G., Brewer, J. B., Zhao, Z., Glover, G. H. & Gabrieli, J. D. Level of sustained  
552 entorhinal activity at study correlates with subsequent cued-recall performance: a functional  
553 magnetic resonance imaging study with high acquisition rate. *Hippocampus* **9**, 35–44 (1999).
- 554 31. Otten, L. J., Henson, R. N. A. & Rugg, M. D. State-related and item-related neural correlates  
555 of successful memory encoding. *Nature Neuroscience* **5**, 1339–1344 (2002).
- 556 32. Schott, B. H. *et al.* The relationship between level of processing and hippocampal-cortical  
557 functional connectivity during episodic memory formation in humans. *Human Brain Mapping*  
558 **34**, 407–424 (2011).

- 559 33. Kamp, S.-M., Bader, R. & Mecklinger, A. ERP subsequent memory effects differ between  
560 inter-item and unitization encoding tasks. *Frontiers in Human Neuroscience* **11** (2017).
- 561 34. Summerfield, C. & Mangels, J. A. Dissociable neural mechanisms for encoding predictable  
562 and unpredictable events. *Journal of Cognitive Neuroscience* **18**, 1120–1132 (2006).
- 563 35. Healey, M. K., Crutchley, P. & Kahana, M. J. Individual differences in memory search and  
564 their relation to intelligence. *Journal of Experimental Psychology: General* **143**, 1553–1569  
565 (2014).
- 566 36. Healey, M. K. & Kahana, M. J. Is memory search governed by universal principles or idiosyn-  
567 cratic strategies? *Journal of Experimental Psychology: General* **143**, 575–596 (2014).
- 568 37. Healey, M. K. & Kahana, M. J. Age-related changes in the dynamics of memory encoding  
569 processes provide a biomarker of successful aging. *Manuscript Submitted for publication*  
570 (2018).
- 571 38. Lohnas, L. J. & Kahana, M. J. Parametric effects of word frequency in memory for mixed  
572 frequency lists. *Journal of Experimental Psychology: Learning, Memory, and Cognition* **39**,  
573 1943–1946 (2013).
- 574 39. Siegel, L. L. & Kahana, M. J. A retrieved context account of spacing and repetition effects  
575 in free recall. *Journal of Experimental Psychology: Learning, Memory, and Cognition* **40**,  
576 755–764 (2014).
- 577 40. Lohnas, L. J., Polyn, S. M. & Kahana, M. J. Expanding the scope of memory search: Modeling  
578 intralist and interlist effects in free recall. *Psychological Review* **122**, 337–363 (2015).



- 579 41. Weidemann, C. T. & Kahana, M. J. Assessing recognition memory using confidence ratings  
580 and response times. *Royal Society Open Science* **3**, 150670 (2016).
- 581 42. Weidemann, C. T. & Kahana, M. J. Dynamics of brain activity reveal a unitary recognition  
582 signal. *Journal of Experimental Psychology: Learning, Memory, and Cognition* **45**, 440–451  
583 (2019).
- 584 43. Warriner, A. B., Kuperman, V. & Brysbaert, M. Norms of valence, arousal, and dominance  
585 for 13,915 English lemmas. *Behavior research methods* **45**, 1191–1207 (2013).
- 586 44. Weidemann, C. T., Mollison, M. V. & Kahana, M. J. Electrophysiological correlates of  
587 high-level perception during spatial navigation. *Psychonomic Bulletin & Review* **16**, 313–319  
588 (2009).
- 589 45. Gramfort, A. *et al.* MEG and EEG data analysis with MNE-python. *Frontiers in Neuroscience*  
590 **7**, 267 (2013).
- 591 46. Gramfort, A. *et al.* MNE software for processing MEG and EEG data. *NeuroImage* **86**, 446–  
592 460 (2014).
- 593 47. Pedregosa, F. *et al.* Scikit-learn: Machine learning in Python. *Journal of Machine Learning*  
594 *Research* **12**, 2825–2830 (2011).

595 **Acknowledgements** This work was supported by Grant MH55687 to MJK. We thank Ada Aka, Yuxuan  
596 Li, Nicole Kratz, Adam Broitman, Isaac Pedisich, Karl Healey, Patrick Crutchley and Elizabeth Crutchley  
597 and other members of the Computational Memory Laboratory at the University of Pennsylvania for their

598 assistance with data collection and preprocessing and Eric Maris, Nora Herweg and Ethan Solomon for  
599 helpful comments on a previous version of this manuscript.

600 **Competing Interests** The authors declare that they have no competing financial interests.

601 **Correspondence** Correspondence and requests for materials should be addressed to C.T.W. (email: [ctw@cogsci.info](mailto:ctw@cogsci.info)).
